# Supplementary material for: Reversible switching between two common protein folds in a designed system using only temperature
Source: PubMed Central journal article supplement — Proc Natl Acad Sci U S A. 2023 Jan 20;120(4):e2215418120. doi: 10.1073/pnas.2215418120 (PMC9942840; doi:10.1073/pnas.2215418120), 2023-01-20
Supplement: pnas.2215418120.sapp.pdf [file pnas.2215418120.sapp.pdf]

## SUPPORTING INFORMATION

### **Reversible switching between two common protein folds in a designed system using only temperature**

Tsega L. Solomon, Yanan He, Nese Sari, Yihong Chen, D. Travis Gallagher, Philip N. Bryan\*,  
and John Orban\*

\***Email:** [pbryan@potomac-affinity-proteins.com](mailto:pbryan@potomac-affinity-proteins.com), [jorban@umd.edu](mailto:jorban@umd.edu)

#### **This file includes:**

Figures S1 to S10

Tables S1 to S3

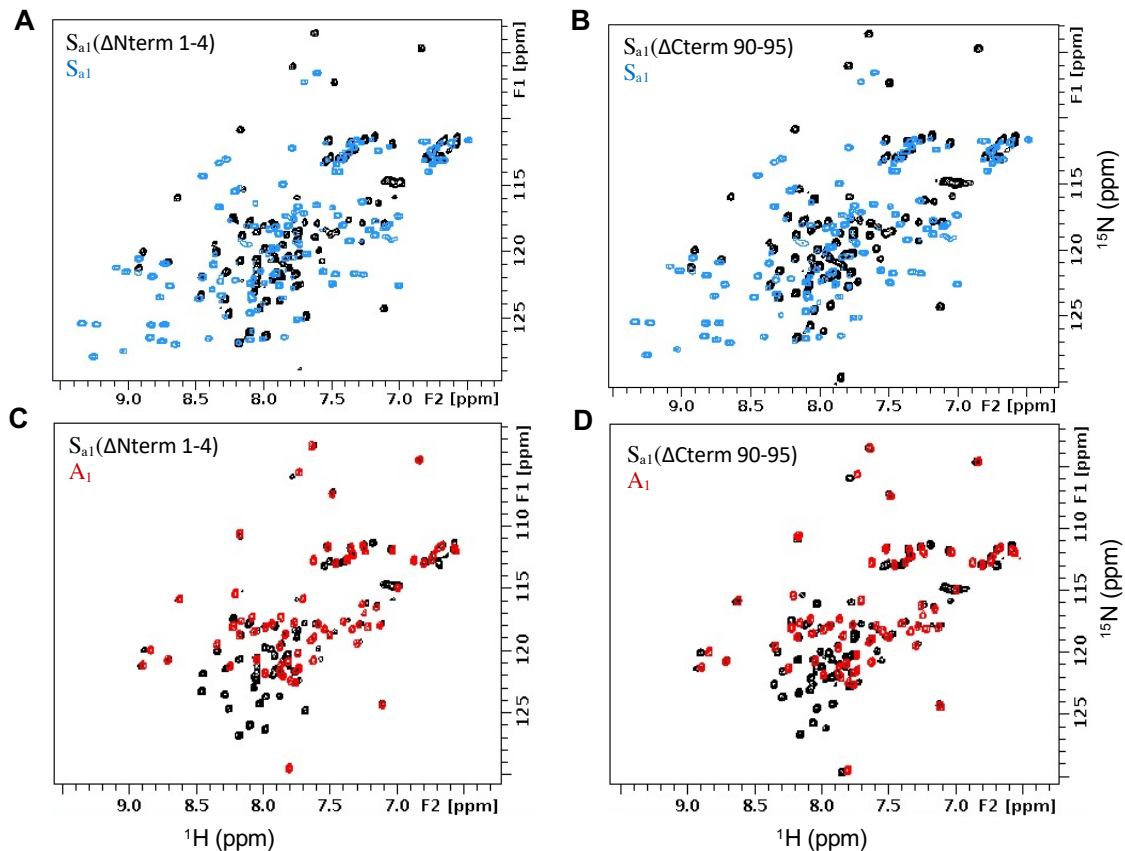

**Figure S1.** Unmasking of the alternate  $3\alpha$  fold with deletion mutations. **(A)** 2D  $^1\text{H}$ - $^{15}\text{N}$  HSQC spectrum of  $S_{a1}(\Delta\text{Nterm1-4})$  (*black*) overlaid with the spectrum of  $\alpha/\beta$ -plait  $S_{a1}$  (*blue*). **(B)** 2D  $^1\text{H}$ - $^{15}\text{N}$  HSQC spectrum of  $S_{a1}(\Delta\text{Cterm90-95})$  (*black*) overlaid with  $S_{a1}$  (*blue*). **(C)** 2D  $^1\text{H}$ - $^{15}\text{N}$  HSQC spectrum of  $S_{a1}(\Delta\text{Nterm1-4})$  (*black*) overlaid with the spectrum of the 56 amino acid  $3\alpha$ -helical protein  $A_1$  (*red*). **(D)** 2D  $^1\text{H}$ - $^{15}\text{N}$  HSQC spectrum of  $S_{a1}(\Delta\text{Cterm90-95})$  (*black*) overlaid with  $A_1$  (*red*). All spectra were recorded at  $5^\circ\text{C}$ .

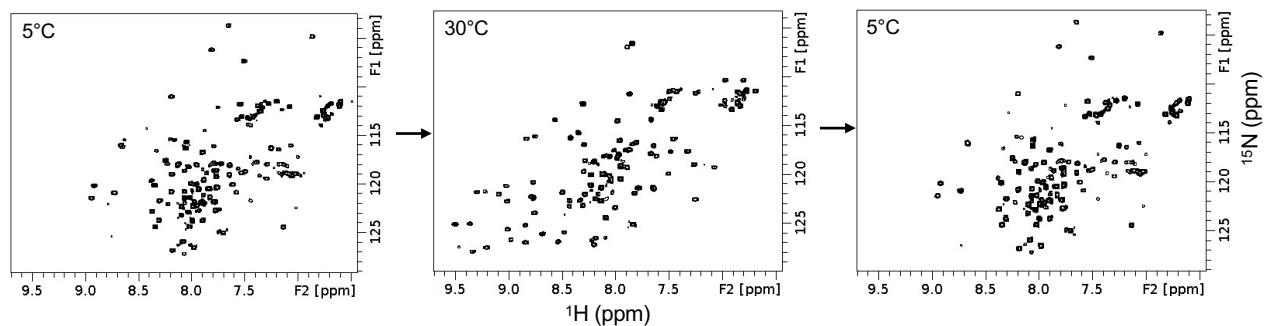

**Figure S2.** Reversibility of  $3\alpha$  to  $\alpha/\beta$ -plait fold conversion. 2D  $^1\text{H}$ - $^{15}\text{N}$  HSQC spectrum of Sa1V90T at 5°C (*left*) before raising the temperature to 30°C (*center*), followed by a spectrum at 5°C (*right*) after acquisition of the 30°C spectrum. Samples equilibrated within the time required (<10 min) for tuning, shimming, and acquisition of the first FID.

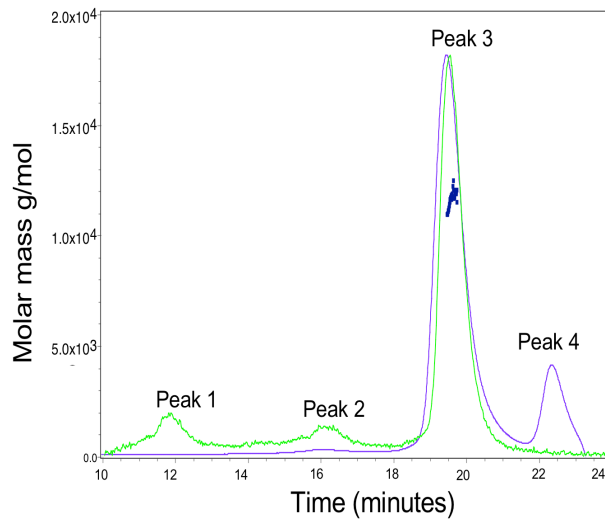

**Figure S3.** Oligomeric state of  $S_{a1}V90T$ . Size exclusion and multi-angle static light scattering analysis of  $S_{a1}V90T$  at  $22^{\circ}C$ . Light scattering (*green*) and the derivative of the refractive index (*purple*) are displayed as a function of retention time. Peak 1 represents the void peak of the column. Peak 2 is a standard calibration peak of bovine serum albumin (68 kDa). Peak 3, where the light scattering and refractive index traces coincide, represents the  $S_{a1}V90T$  sample having a monodispersed, derived molecular weight of 11.1 kDa (*blue*). This is within 6% error of the monomeric molecular weight calculated based on the amino acid sequence. Peak 4 in the refractive index trace is a buffer mismatch artifact.

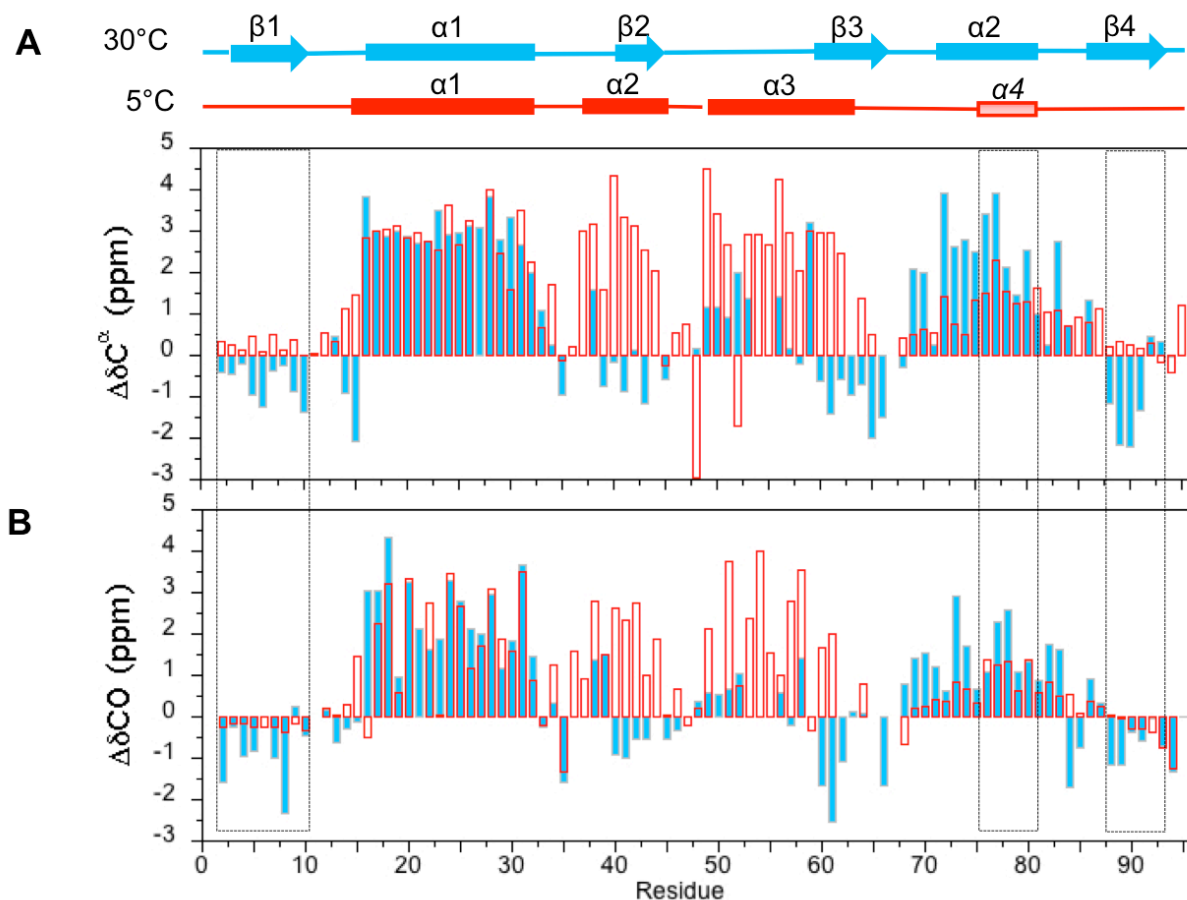

**Figure S4.** Secondary chemical shift analysis for S<sub>a1</sub>V90T as a function of temperature. **(A)** Backbone C $\alpha$  chemical shift differences between measured and calculated random coil values of S<sub>a1</sub>V90T at 5°C (*red*) and 30°C (*cyan*). **(B)** Corresponding backbone CO chemical shift differences. Highlighted regions show extent of propensity for the alternate conformation in the N- and C-terminal ends of S<sub>a1</sub>V90T.

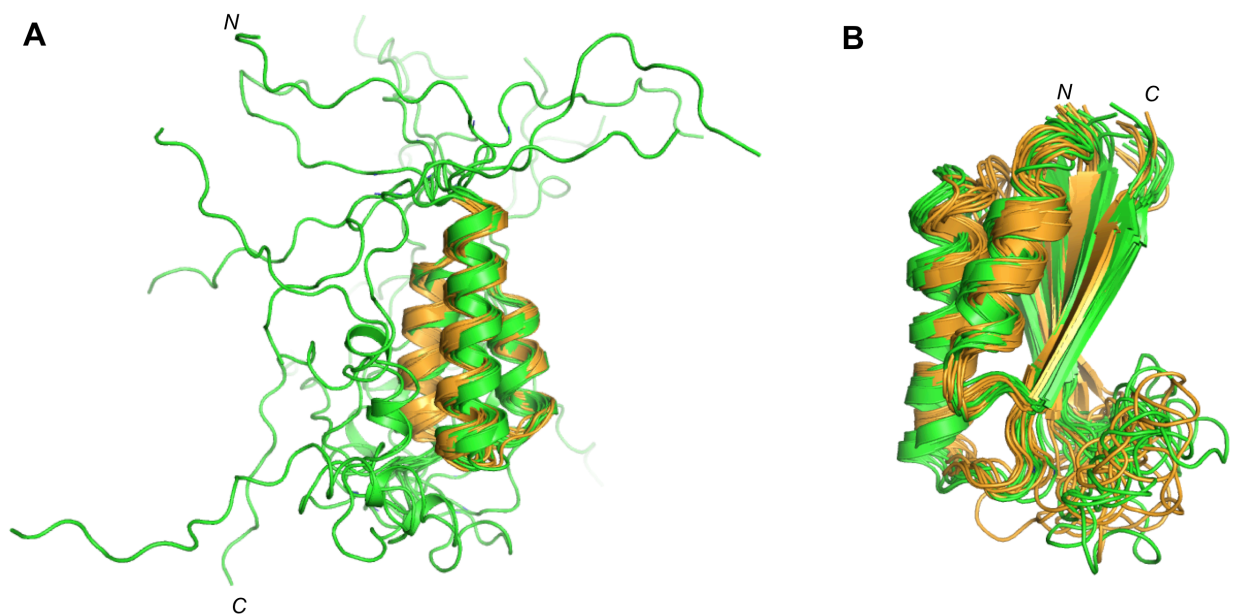

**Figure S5.** Comparison of S<sub>a1</sub>V90T structures at 5°C and 30°C with the parent folds, A<sub>1</sub> (3α) and S<sub>a1</sub> (α/β-plait). **(A)** The ensemble of 95-residue S<sub>a1</sub>V90T structures at 5°C (green) is overlaid with the ensemble of 56-residue A<sub>1</sub> structures (PDBDev 00000083<sup>15</sup>, orange). The average backbone RMSD over the corresponding 3α regions is 0.4Å. **(B)** The ensemble of S<sub>a1</sub>V90T structures at 30°C (green) overlaid with the S<sub>a1</sub> ensemble (PDB 7MN1<sup>15</sup>, orange). The average backbone RMSD over ordered regions is 0.9Å.

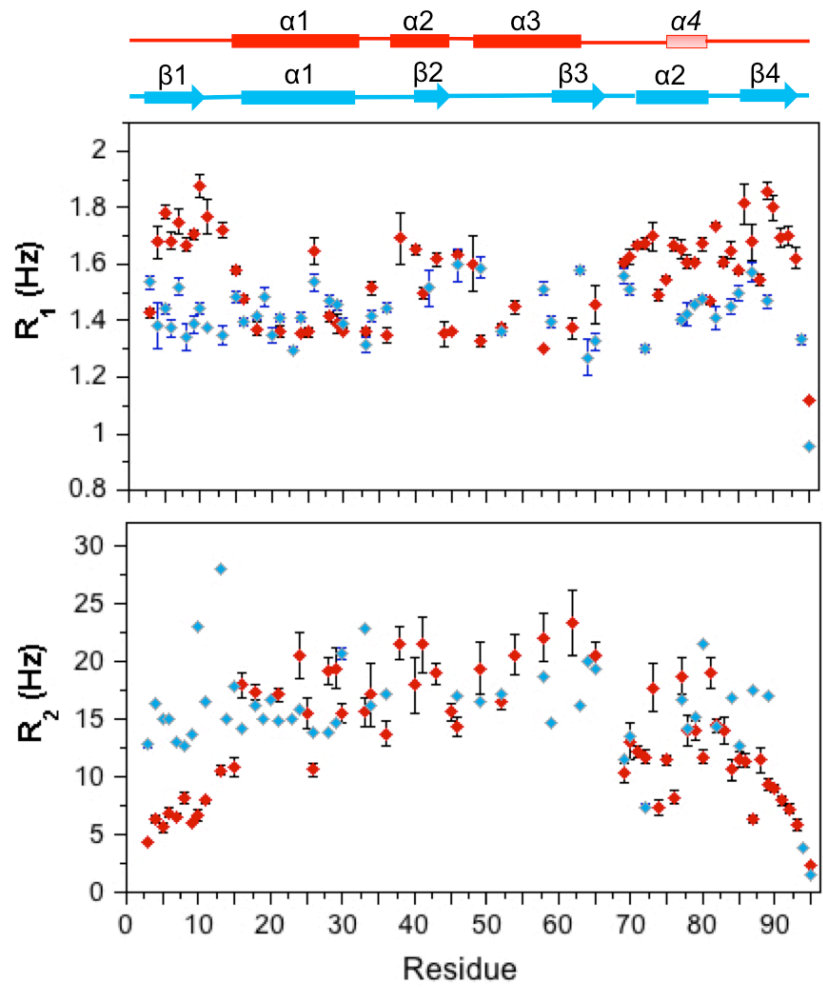

**Figure S6.** Backbone dynamic characterization of S<sub>a1</sub>V90T at 17°C. <sup>15</sup>N-R<sub>1</sub> and <sup>15</sup>N-R<sub>2</sub> rates for S<sub>a1</sub>V90T where 3α (red) and α/β-plait (blue) forms are equally populated. The errors for the α/β-plait R<sub>2</sub> values are within the data point markers.

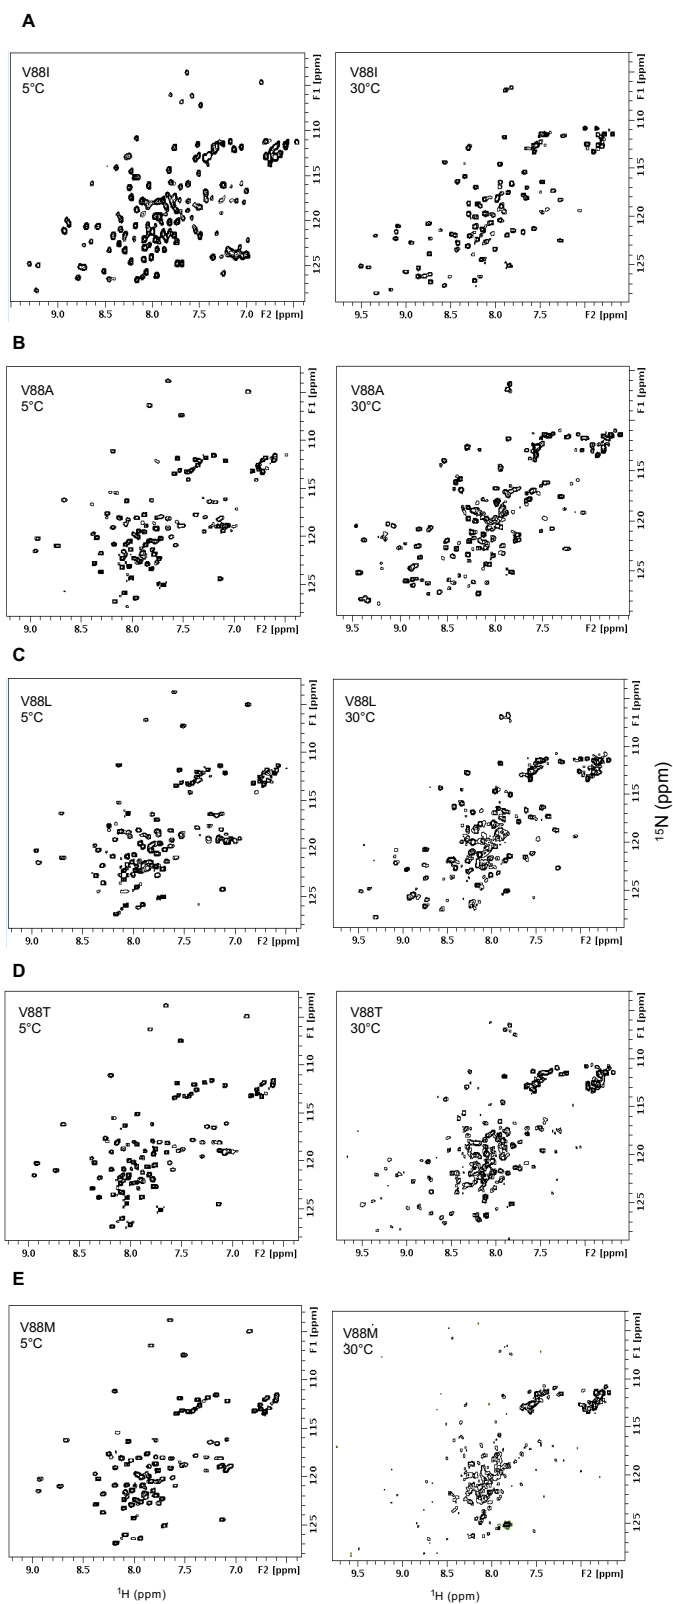

**Figure S7.** Conformational analysis of  $S_{a1}$ V88X mutants. 2D  $^1\text{H}$ - $^{15}\text{N}$  HSQC spectra of  $S_{a1}$  mutants V88I (A), V88A (B), V88L (C), V88T (D), and V88M (E) at 5°C (*left*) and 30°C (*right*).



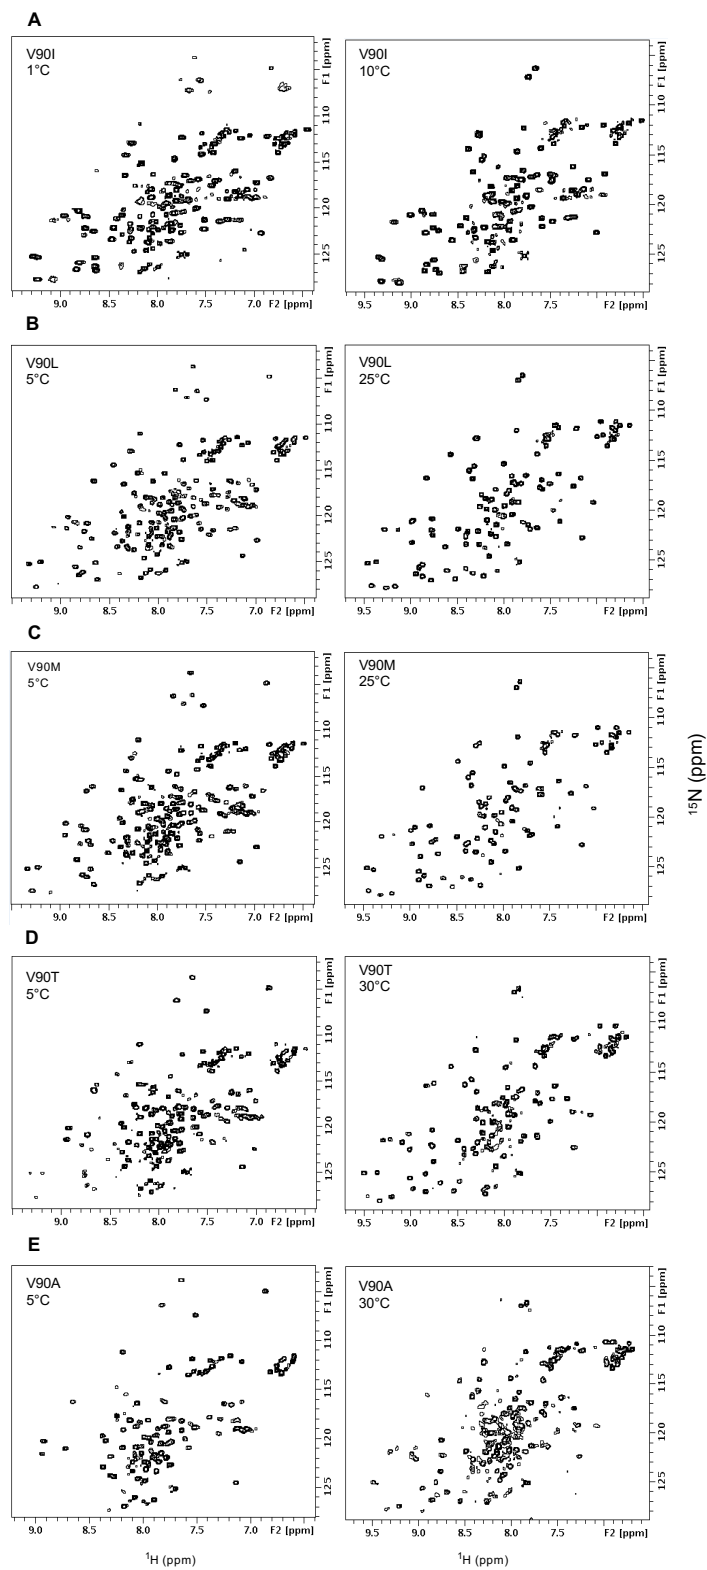

**Figure S8.** Conformational analysis of  $S_{a1}V90X$  mutants. 2D  $^1\text{H}$ - $^{15}\text{N}$  HSQC spectra of  $S_{a1}$  mutants V90I (A), V90L (B), V90M (C), V90T (D), and V90A (E) at 1 or 5°C (*left*) and 10, 25 or 30°C (*right*).

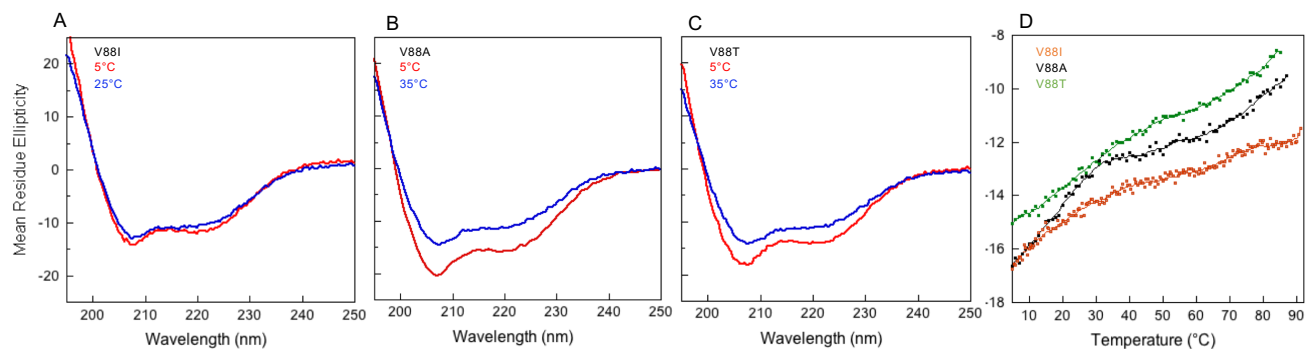

**Figure S9.** Analysis of conformation and thermal denaturation by CD. Mean residue ellipticity versus wavelength is plotted for **(A)** V88I at 5°C and 25°C, **(B)** V88A at 5°C and 35°C, and **(C)** V88T at 5°C and 35°C using a 1 mm path length cuvette with 5  $\mu$ M protein sample. **(D)** Mean residue ellipticity is plotted versus temperature for the three V88 mutants in the range from 5 to 90°C. The increase in ellipticity at 222 nm for S<sub>a1</sub>V88T at high temperature indicates less secondary structure than for V88A, leading to an approximate order of V88I>V88A>V88T  $\alpha/\beta$ -plait stability.

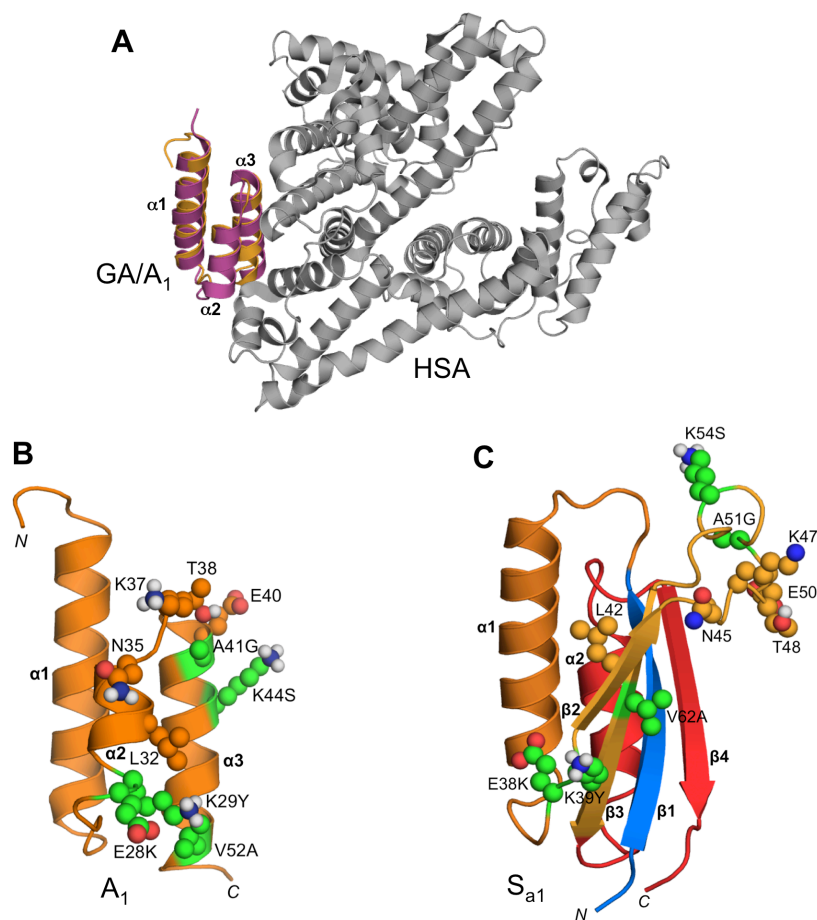

**Figure S10.** Engineering HSA-binding function into  $A_1$  and  $S_{a1}$ . **(A)** The structure of  $A_1$  (orange) is aligned with wild-type GA (magenta) bound to HSA (gray), PDB 1TF0. **(B)** NMR structure of  $A_1$ <sup>15</sup> showing the HSA binding site residues in sphere representation. **(C)** NMR structure of  $S_{a1}$ <sup>15</sup> showing positions of HSA binding site residues in sphere representation. Those in orange (L42, N45, K47, T48, and E50) are already present in  $A_1$  and  $S_{a1}$  while those in green (E38K, K39Y, A51G, K54S, and V62A) were introduced by site directed mutagenesis.

**Table S1.** Summary of structure statistics.

|                                              | S <sub>al</sub> V90T, 5°C | S <sub>al</sub> V90T, 30°C |
|----------------------------------------------|---------------------------|----------------------------|
| <i>A. Experimental restraints</i>            |                           |                            |
| NOE restraints                               |                           |                            |
| Intraresidue                                 |                           | 50                         |
| Sequential ( i-j =1)                         |                           | 74                         |
| Medium-range (1< i-j ≤5)                     |                           | 72                         |
| Long-range ( i-j >5)                         |                           | 31                         |
| Hydrogen bond restraints                     |                           | 83                         |
| Total NOE restraints                         |                           | 310                        |
| CS-Rosetta input                             |                           |                            |
| <sup>13</sup> C <sup>α</sup> shifts          | 90                        | 90                         |
| <sup>13</sup> C <sup>β</sup> shifts          | 79                        | 85                         |
| <sup>13</sup> CO shifts                      | 86                        | 82                         |
| <sup>15</sup> N shifts                       | 87                        | 83                         |
| <sup>1</sup> H <sup>N</sup> shifts           | 87                        | 83                         |
| <sup>1</sup> H <sup>α</sup> shifts           | 41                        | 39                         |
| <i>B. Secondary structure RMSDs</i>          |                           |                            |
| <i>to the mean structure (Å)<sup>a</sup></i> |                           |                            |
| Backbone atoms                               | 0.90 ± 0.45               | 1.15 ± 0.31                |
| Heavy atoms                                  | 1.59 ± 0.48               | 1.81 ± 0.35                |
| <i>C. Measures of structure quality (%)</i>  |                           |                            |
| Ramachandran distribution                    |                           |                            |
| Most favored                                 | 94.50 ± 2.20              | 92.55 ± 2.49               |
| Additionally allowed                         | 5.00 ± 2.20               | 7.22 ± 2.42                |
| Generously allowed                           | 0.34 ± 0.70               | 0.11 ± 0.35                |
| Disallowed                                   | 0                         | 0.11 ± 0.35                |
| Bad contacts                                 | 1.20 ± 0.80               | 0.50 ± 0.71                |
| Overall dihedral G factor                    | 0.37 ± 0.05               | 0.28 ± 0.02                |
| <i>D. PDB/BMRB codes</i>                     |                           |                            |
| PDB/PDBDev                                   | 00000132                  | 8E6Y                       |
| BMRB                                         | 51338                     | 51339                      |

<sup>a</sup> Stable secondary structure regions used were as follows: At 5°C, residues 15-32, 37-45, and 49-63; at 30°C, residues 3-10, 16-32, 40-44, 60-66, 72-81, and 86-92.

**Table S2.** Temperature dependence of correlation times ( $\tau_c$ , ns) for S<sub>al</sub>V90T regions.

|                                    | $\tau_c$ (5°C) | $\tau_c$ (17°C) | $\tau_c$ (30°C) |
|------------------------------------|----------------|-----------------|-----------------|
| 3- $\alpha$ <sup>a</sup>           | 16.5           | 10.6            | -               |
| $\alpha$ 4 <sup>b</sup>            | 11.0           | 8.7             | -               |
| N-terminus <sup>c</sup>            | 5.5            | 5.4             | -               |
| C-terminus <sup>d</sup>            | 7.7            | 6.7             | -               |
| $\alpha/\beta$ -plait <sup>e</sup> | -              | 9.8             | 6.7             |

<sup>a</sup> Residues 10-66; <sup>b</sup> residues 75-81; <sup>c</sup> residues 1-10; <sup>d</sup> residues 67-95; <sup>e</sup> residues 2-95. Correlation times are obtained from equation 2 using the average  $T_1$  and  $T_2$  values corresponding to each region.

**Table S3.** Exchange rate constants from ZZ-exchange spectroscopy.<sup>a</sup>

| Temperature | Residue <sup>b</sup> | K <sub>eq</sub> | k <sub>αβ→3α</sub><br>(s <sup>-1</sup> ) | k <sub>3α→αβ</sub><br>(s <sup>-1</sup> ) |
|-------------|----------------------|-----------------|------------------------------------------|------------------------------------------|
| 10°C        | Q16                  | 0.77            | 0.7 ± 0.2                                | 0.6 ± 0.1                                |
|             | G34                  | 0.45            | 1.2 ± 0.3                                | 0.5 ± 0.1                                |
|             | G58                  | 0.35            | 1.6 ± 0.4                                | 0.6 ± 0.1                                |
|             | <b>Mean</b>          | <b>0.52</b>     | <b>1.2 ± 0.3</b>                         | <b>0.6 ± 0.1</b>                         |
| 17°C        | Q16                  | 1.48            | 1.0 ± 0.1                                | 1.4 ± 0.2                                |
|             | G34                  | 1.19            | 1.3 ± 0.3                                | 1.6 ± 0.4                                |
|             | G58                  | 1.05            | 1.4 ± 0.3                                | 1.5 ± 0.3                                |
|             | <b>Mean</b>          | <b>1.24</b>     | <b>1.2 ± 0.2</b>                         | <b>1.5 ± 0.3</b>                         |
| 24°C        | Q16                  | 2.33            | 1.4 ± 0.3                                | 3.3 ± 0.7                                |
|             | G34                  | 2.67            | 1.6 ± 0.4                                | 4.0 ± 0.9                                |
|             | G58                  | 2.53            | 1.3 ± 0.3                                | 3.4 ± 0.7                                |
|             | <b>Mean</b>          | <b>2.51</b>     | <b>1.4 ± 0.3</b>                         | <b>3.6 ± 0.8</b>                         |

<sup>a</sup> Exchange rates were determined from equation 4 as described in the Materials and Methods section. <sup>b</sup> Residues Q16, G34, and G58 were chosen due to their well-resolved cross-peaks and auto-peaks.
